# Supplementary material for: A Bacterial Analysis Platform: An Integrated System for Analysing Bacterial Whole Genome Sequencing Data for Clinical Diagnostics and Surveillance
Source: PLoS One. 2016 Jun 21;11(6):e0157718. doi: 10.1371/journal.pone.0157718 (PMC4915688; doi:10.1371/journal.pone.0157718)
Supplement: S4 Excelsheet — (XLSX) [file pone.0157718.s006.xlsx]

## Sheet: Metadata
sample_name	file_names	pre_assembled	sequencing_platform	sequencing_type	organism	strain	subtype	country	region	city	zip_code	longitude	latitude	location_note	isolation_source	source_note	pathogenic	pathogenicity_note	collection_date	collected_by	notes
Test sample	contigs.fsa	yes	Illumina	unknown				Denmark		Lyngby	2800				human				2014-02-28	Center for Genomic Epidemiology	This is a test sample

## Sheet: Attribute description
Attribute Description
Field Name	Mandatory	Description
sample_name	No	The name of the isolate the user uses to identify the sample
file_names	Yes	Name of all files associated to this sample. Multiple filenames should be seperated by a space
pre_assembled	Yes	Has the uploaded sample data been assembled? yes / no
sequencing_platform	Conditional	Choose between: LS454, Illumina, Ion Torrent or ABI SOLiD. Required if the sample is not pre_assembled.
sequencing_type	Conditional	Choose between: single, paired or mate-paired. Required if the sample is not pre_assembled.
organism	No	Scientific name of the organism. If left blanc default is 'unknown'.
strain	No	Strain type ID
subtype	No	Subspecific genetic linage, i.e MLST, serovar and biotype
country	Yes
region	No
city	(No)	Please provide as much information as possible. Low resolution locations reduce the usability. Our recommendation is to provide either city, zip_code or longitude and latitude coordinates.
zip_code	(No)
longitude	(No)
latitude
location_note	No	Additional relevant details about the location
isolation_source	Yes	Choose between: human, water, food, animal, laboratory, other or unknown.
source_note	No	Additional relevant details about the isolation source. i.e. blood, laboratory experiment or urine
pathogenic	No	Is the organism decreed pathogenic? [yes, no, unknown]. If left blanc default is 'unknown'.
pathogenicity_note	No	Additional relevant details about the organism's pathogenicity
collection_date	Yes	The date of the sample collection. Use one of the following format: YYYY-MM-DD, YYYY-MM or YYYY
collected_by	No	Name of the institute or person who took the sample
notes	No	Any additional information can be added
